# Supplementary material
Source: PubMed Central journal article supplement (PMC4238002)
Supplement: supp_db14-0466_DB140466SupplementaryData1.pdf [file supp_db14-0466_DB140466SupplementaryData1.pdf]

SUPPLEMENTARY DATA

**Supplementary Figure 1.** Body weights (A) and interscapular BAT (BAT) weights (B) of control and KO female mice. (n=4 each group). Glucose tolerance test (C) and insulin tolerance test (D) of 20 weeks old female mice (n=4 each group). \*P<0.05, t-test ; Means  $\pm$  SEM.

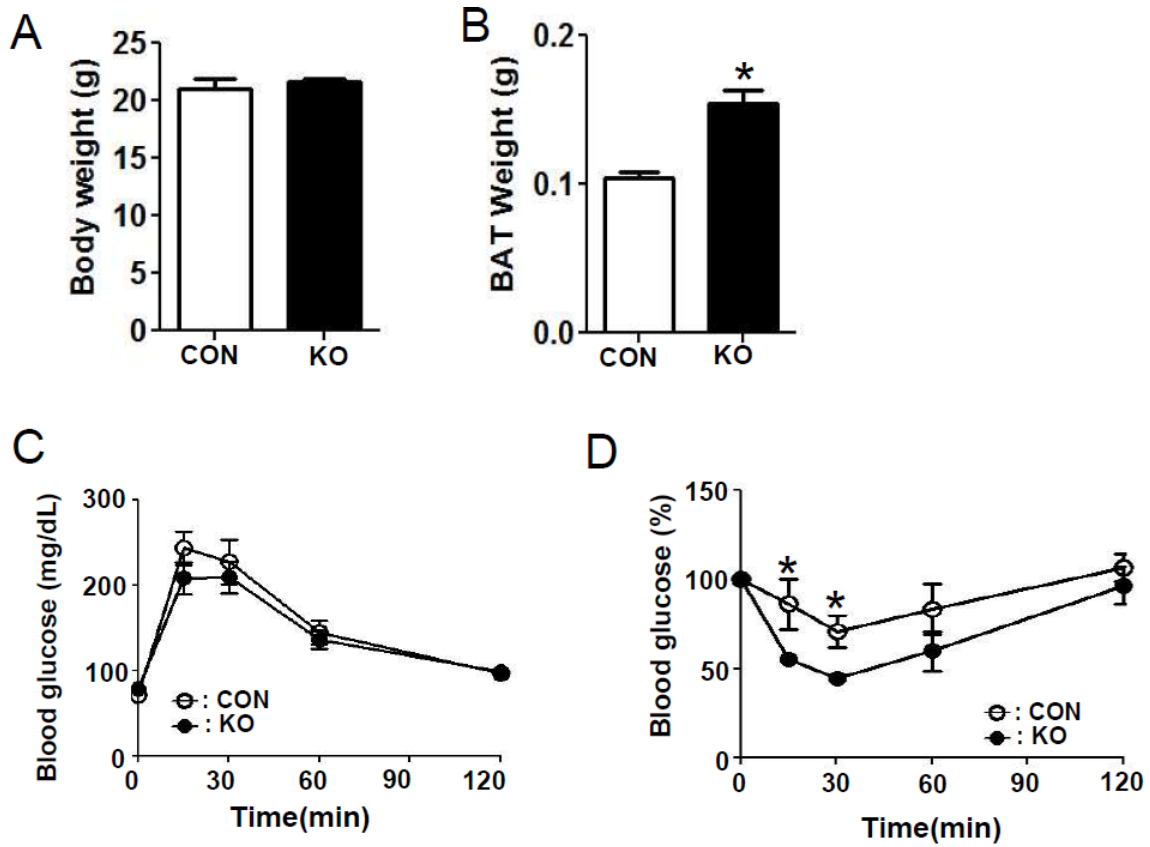

SUPPLEMENTARY DATA

**Supplementary Figure 2.** (A) Oil red O staining of primary brown adipocyte cultures 4 days after differentiation with Ad-GFP or Ad-Cre infection. (B) Real-PCR results of miR-143, miR-193a, miR-193b and miR-365 expression 4 days after differentiation of primary brown adipocyte with Ad-GFP or Ad-Cre infection. (C) Real-time PCR results of thermogenesis related markers (Ucp1 and Pgc1 $\alpha$ ), brown fat markers (Prdm16, Cidea and Ppar  $\alpha$ ) and adipocyte differentiation markers (Ppar $\gamma$ , Fabp4, AdipoQ and Cebp $\alpha$ ) 4 days after differentiation of primary brown adipocyte with Ad-GFP or Ad-Cre infection (n=3 each group) \*P<0.05, t-test ; Means  $\pm$  SEM.

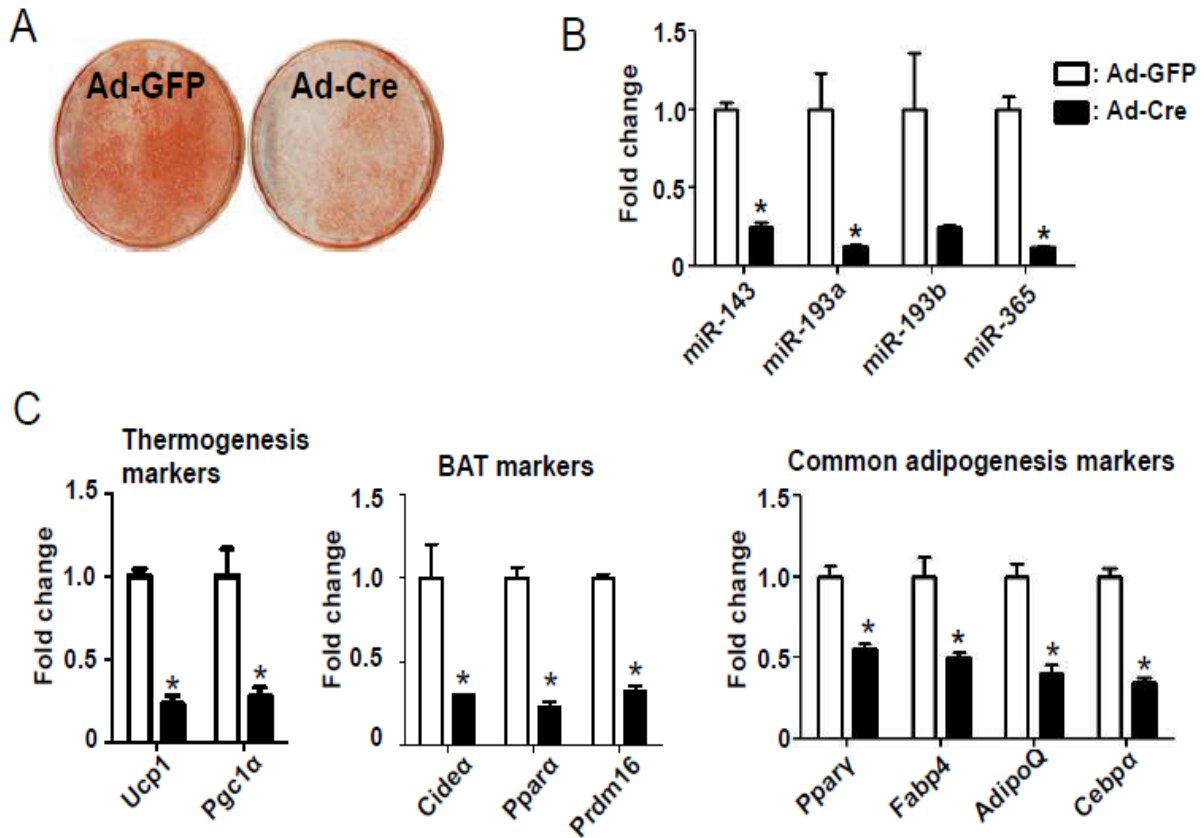

SUPPLEMENTARY DATA

**Supplementary Figure 3.** (A) Real-time PCR to examine RNA expression of Ppar $\gamma$ , Fabp4, Glut4, AdipoQ, Leptin and Cebpa of Epididymal fat (EPI) \*P<0.05, t-test ; Means  $\pm$  SEM. (B) Quantification of fatty acid release from fat pad explants. 20 mg of epididymal fat pads were removed from mice and incubated at 37 °C in Krebs-Ringer buffer (12 mM HEPES, 121 NaCl, 4.9 mM KCl, 1.2 mM MgSO $_4$ , and 0.33 mM CaCl $_2$ ) with 3.5% fatty acid-free BSA and 3 mM glucose (KRB), with 200 nM isoproterenol (Sigma). Medium was collected at 1, 2, and 4 h, and glycerol content was measured enzymatically (Sigma).

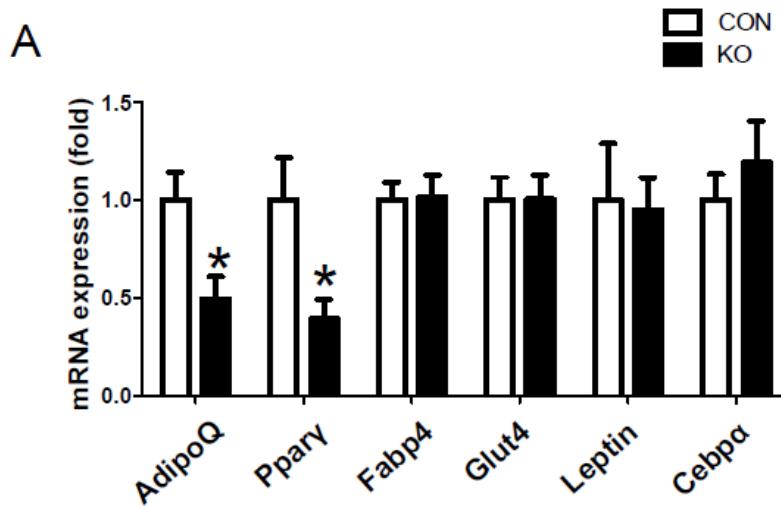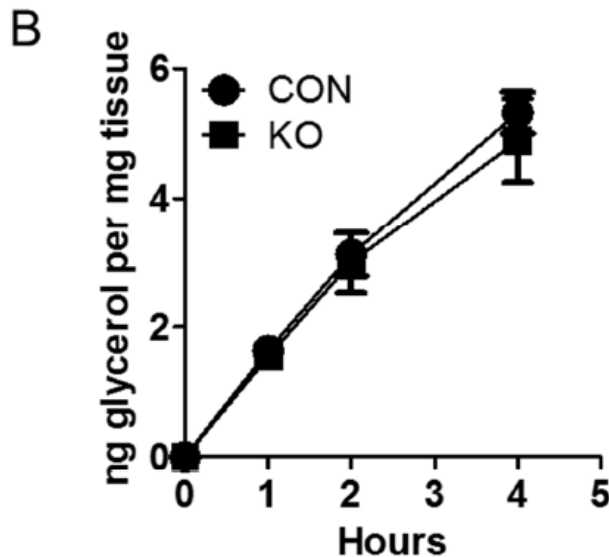

SUPPLEMENTARY DATA

**Supplementary Figure 4.** (A) Genotyping results of deletion efficiency of *Dgcr8* in primary white adipocyte cultures. (B) Oil red O staining of primary white adipocyte cultures 8 days after differentiation. (C) Real-time PCR results of adipocyte differentiation markers (*AdipoQ*, *Cebpa*, *Fabp4*, *Glut4*, *Pparγ* and *Leptin*) 8 days after differentiation of primary subcutaneous white adipocyte culture from control and KO mice (n=3 each group). (D) Subcutaneous white adipocyte culture was treated with Rosiglitazone (1μM) and Norepinephrine (1μM) for 8 days to induce “browning” and Real-time PCR was used to examine the browning marker expression. \*P<0.05, t-test ; Means ± SEM.

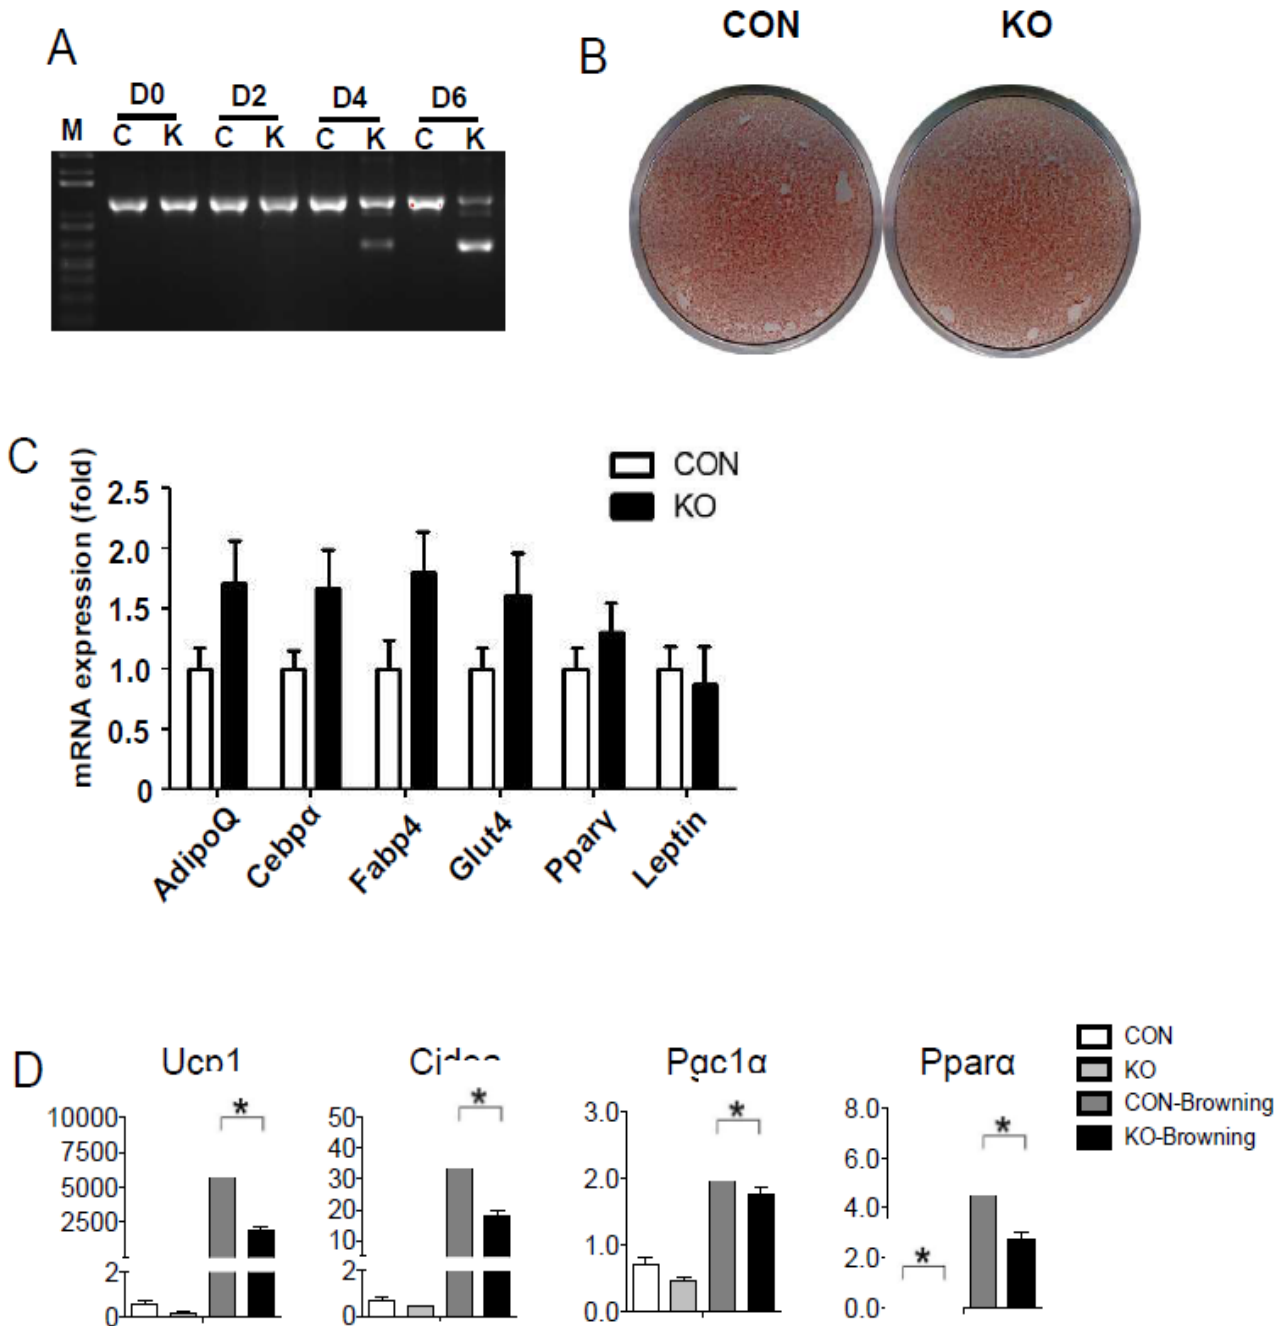

SUPPLEMENTARY DATA

**Supplementary Figure 5.** MicroRNA mimics (5nM for each mimic) for all 10 BAT-enriched microRNAs identified in Fig 4 were pooled together and transfected into the primary brown adipocytes from Control and KO mice at day 4 during the differentiation. After transfection, the cells were further differentiated for 4 more days. Real-time PCR was performed to examine the expression of Ucp1, Fabp4 and Pparg. (n=3 each group) \*P<0.05, t-test ; Means  $\pm$  SEM.

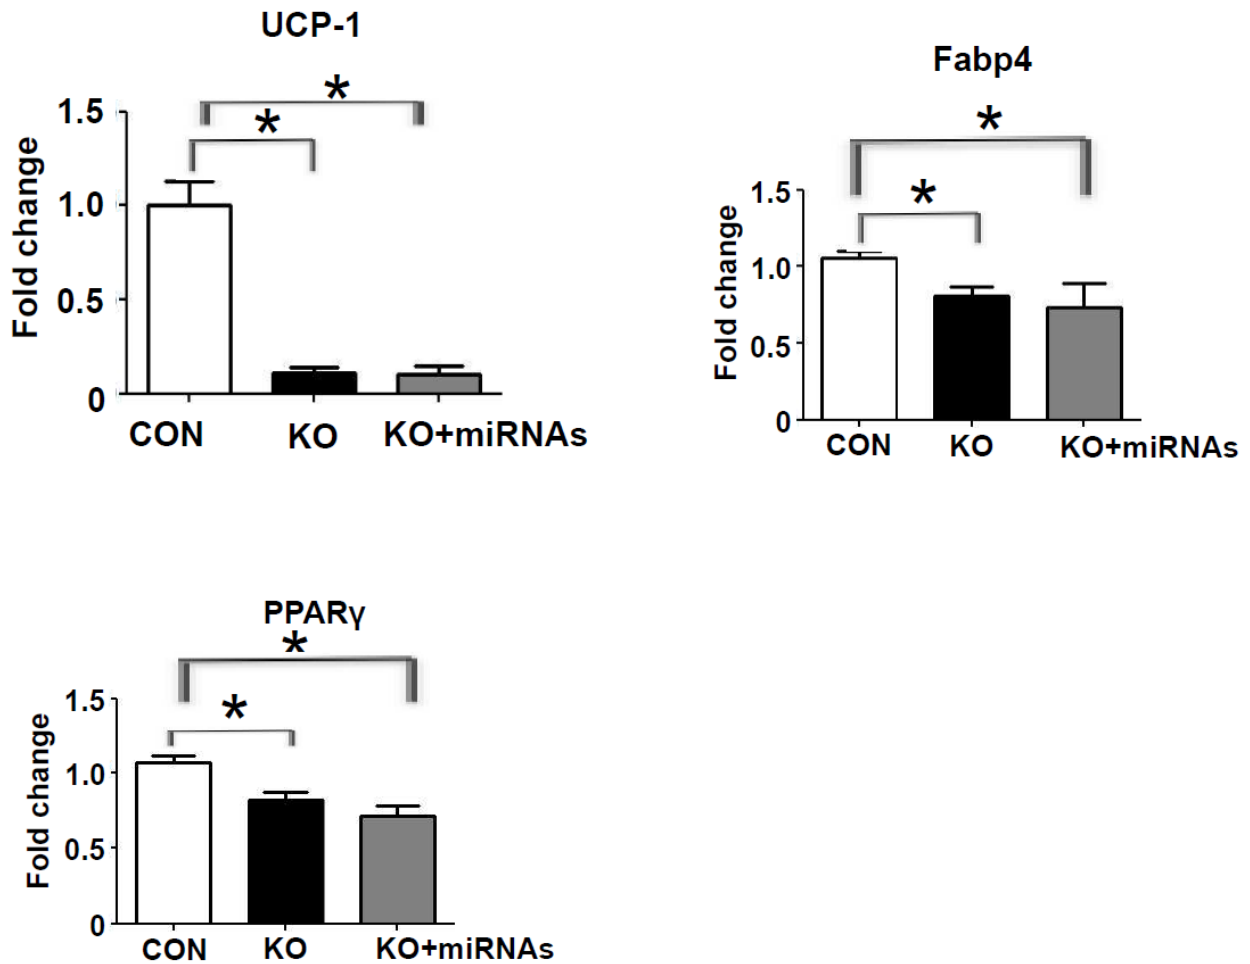

SUPPLEMENTARY DATA

**Supplementary Table 1.** Real-time PCR primers.

|               | FORWARD               | REVERSE                |
|---------------|-----------------------|------------------------|
| <b>18S</b>    | GTAACCCGTTGAACCCCAT   | CCATCCAATCGGTAGTAGC    |
| <b>AdipoQ</b> | CGATTGTCAGTGGATCTGACG | CAACAGTAGCATCCTGAGCCCT |
| <b>Cebpa</b>  | TGCGCAAGAGCCGAGATAAA  | CCTTCTGTTGCGTCTCCACG   |
| <b>Cidea</b>  | TGCTCTTCTGTATCGCCCAGT | GCCGTGTTAAGGAATCTGCTG  |
| <b>Cox8b</b>  | GAACCATGAAGCCAACGACT  | GCGAAGTTCACAGTGGTTCC   |
| <b>Fabp4</b>  | ACAAGCTGGTGGTGAATGTG  | CCTTTGGCTCATGCCCTTT    |
| <b>Glut4</b>  | CTGTCGCTGGTTTCTCCAAC  | CCCATAGCATCCGCAACATA   |
| <b>Pgc1a</b>  | CCCTGCCATTGTTAAGACC   | TGCTGCTGTTCTGTTTTT     |
| <b>Ppara</b>  | AGAGCCCCATCTGTCCTCTC  | ACTGGTAGTCTGCAAAACAAA  |
| <b>Pparg</b>  | GTGCCAGTTTCGATCCGTAGA | GGCCAGCATCGGTAGATGA    |
| <b>Prdm16</b> | CAGCACGGTGAAGCCATTC   | GCGTGCATCCGCTTGTG      |
| <b>Ucp1</b>   | ACTGCCACACCTCCAGTCATT | CTTGCCTCACTCAGGATTGG   |
| <b>Cebpb</b>  | CGTTCATGCACCGCTGCG    | AGGGGCTGAAGTCGATGCCG   |
| <b>Cox4</b>   | ACCAAGCGAATGCTGGACAT  | GGCGGAGAAGCCCTGAA      |
| <b>Cox7</b>   | CAGCGTCATGGTCCAGTCTGT | AGAAAACCGTGTGGCAGAGA   |
| <b>Leptin</b> | GAGACCCCTGTGACGGTT    | CTGCGTGTGTGAAATGTCATTG |
